# Supplementary material for: The Anodontini of Vietnam (Mollusca: Bivalvia: Unionidae: Unioninae) with the Description of a New Species
Source: MDPI journal article supplement (doi:10.3390/d15060710), 2023-05-26
Supplement: s1 [file s1]

**Supplementary Table S3.** List of sequences used for the phylogenetic relationships within the genus *Sinanodonta* with respective haplotypes, localities, voucher numbers or specimen codes, and GenBank references. Acronyms for the voucher deposit institutions as follows: CIIMAR – Interdisciplinary Centre of Marine and Environmental Research, Porto, Portugal; MHS – Matsuyama High School, Japan; NCSM – North Carolina Museum of Natural Sciences, U.S.A.; NCU – Nanchang University, China; NNIBR – Nakdonggang National Institute of Biological Resources, South Korea; OMNH – Osaka Museum of Natural History, Japan; RMBH – Russian Museum of Biodiversity Hotspots, Arkhangelsk, Russia.

| Reference | Species                          | Haplotype | Latitude | Longitude | River/Lake    | Region  | Country | Voucher           | Study                      |
|-----------|----------------------------------|-----------|----------|-----------|---------------|---------|---------|-------------------|----------------------------|
| INGROUP   |                                  |           |          |           |               |         |         |                   |                            |
| MG463053  | <i>Sinanodonta angula</i>        | 41        | -----    | -----     | Yangtze basin | Jiangxi | China   | NCU 16_XPWU_SU143 | Huang et al 2019 [17]      |
| MG463054  | <i>Sinanodonta angula</i>        | 43        | -----    | -----     | Yangtze basin | Jiangxi | China   | NCU 16_XPWU_SU142 | Huang et al 2019 [17]      |
| MG463055  | <i>Sinanodonta angula</i>        | 40        | -----    | -----     | Yangtze basin | Hunan   | China   | NCU 16_XPWU_SU141 | Huang et al 2019 [17]      |
| MG463056  | <i>Sinanodonta angula</i>        | 42        | -----    | -----     | Yangtze basin | Hunan   | China   | NCU 16_XPWU_SU140 | Huang et al 2019 [17]      |
| MG463057  | <i>Sinanodonta angula</i>        | 39        | -----    | -----     | Yangtze basin | Hunan   | China   | NCU 16_XPWU_SU139 | Huang et al 201 9 [17]     |
| MT020628  | <i>Sinanodonta calipygos</i>     | 67        | 40.7035  | 141.3258  | Anemuma Lake  | Aomori  | Japan   | MHS SCAM-01       | Lopes-Lima et al 2020 [18] |
| MT020628  | <i>Sinanodonta calipygos</i>     | 67        | 40.7035  | 141.3258  | Anemuma Lake  | Aomori  | Japan   | MHS SCAM-02       | Lopes-Lima et al 2020 [18] |
| MT020624  | <i>Sinanodonta calipygos</i>     | 63        | 34.8225  | 135.4182  | Kanzaki River | Osaka   | Japan   | MHS SCOS-01       | Lopes-Lima et al 2020 [18] |
| MT020624  | <i>Sinanodonta calipygos</i>     | 63        | 35.2929  | 136.2219  | Biwa Lake     | Shiga   | Japan   | MHS SCSG-01       | Lopes-Lima et al 2020 [18] |
| MT020624  | <i>Sinanodonta calipygos</i>     | 63        | 35.2929  | 136.2219  | Biwa Lake     | Shiga   | Japan   | MHS SCSG-02       | Lopes-Lima et al 2020 [18] |
| MT020625  | <i>Sinanodonta calipygos</i>     | 64        | 35.2929  | 136.2219  | Biwa Lake     | Shiga   | Japan   | MHS SCSG-03       | Lopes-Lima et al 2020 [18] |
| MT020626  | <i>Sinanodonta calipygos</i>     | 65        | 35.2929  | 136.2219  | Biwa Lake     | Shiga   | Japan   | MHS SCSG-04       | Lopes-Lima et al 2020 [18] |
| MT020626  | <i>Sinanodonta calipygos</i>     | 65        | 35.2929  | 136.2219  | Biwa Lake     | Shiga   | Japan   | MHS SCSG-05       | Lopes-Lima et al 2020 [18] |
| MT020627  | <i>Sinanodonta calipygos</i>     | 66        | 35.2929  | 136.2219  | Biwa Lake     | Shiga   | Japan   | MHS SCSG-06       | Lopes-Lima et al 202 [18]0 |
| MT020623  | <i>Sinanodonta calipygos</i>     | 62        | 35.1484  | 136.0431  | Biwa Lake     | Shiga   | Japan   | MHS SC_Shiga_4    | Lopes-Lima et al 2020 [18] |
| KJ434488  | <i>Sinanodonta cf. elliptica</i> | 29        | -----    | -----     | Yangtze basin | -----   | China   | NCU 110ANWP2      | Uyang et al Unp.           |
| KJ434489  | <i>Sinanodonta cf. elliptica</i> | 29        | -----    | -----     | Yangtze basin | -----   | China   | NCU 164ANWP3      | Uyang et al Unp.           |
| KJ434490  | <i>Sinanodonta cf. elliptica</i> | 29        | -----    | -----     | Yangtze basin | -----   | China   | NCU 176ANWP4      | Uyang et al Unp.           |
| MG463058  | <i>Sinanodonta cf. elliptica</i> | 32        | -----    | -----     | Yangtze basin | -----   | China   | NCU 16_XPWU_SU148 | Huang et al 2019 [17]      |
| MG463059  | <i>Sinanodonta cf. elliptica</i> | 32        | -----    | -----     | Yangtze basin | -----   | China   | NCU 16_XPWU_SU149 | Huang et al 2019 [17]      |
| MG463061  | <i>Sinanodonta cf. elliptica</i> | 29        | -----    | -----     | Yangtze basin | -----   | China   | NCU 16_XPWU_SU145 | Huang et al 2019 [17]      |
| MG463062  | <i>Sinanodonta cf. elliptica</i> | 29        | -----    | -----     | Yangtze basin | -----   | China   | NCU 16_XPWU_SU146 | Huang et al 2019 [17]      |
| MG463063  | <i>Sinanodonta cf. elliptica</i> | 32        | -----    | -----     | Yangtze basin | -----   | China   | NCU 16_XPWU_SU147 | Huang et al 2019 [17]      |
| MG463064  | <i>Sinanodonta cf. elliptica</i> | 35        | -----    | -----     | Yangtze basin | -----   | China   | NCU 16_XPWU_SU151 | Huang et al 2019 [17]      |
| MG463065  | <i>Sinanodonta cf. elliptica</i> | 31        | -----    | -----     | Yangtze basin | -----   | China   | NCU 16_XPWU_SU150 | Huang et al 2019 [17]      |
| MG463067  | <i>Sinanodonta cf. elliptica</i> | 33        | -----    | -----     | Yangtze basin | -----   | China   | NCU 16_XPWU_SU157 | Huang et al 2019 [17]      |
| MG463071  | <i>Sinanodonta cf. elliptica</i> | 32        | -----    | -----     | Yangtze basin | -----   | China   | NCU 16_XPWU_SU156 | Huang et al 2019 [17]      |
| MG463072  | <i>Sinanodonta cf. elliptica</i> | 30        | -----    | -----     | Yangtze basin | -----   | China   | NCU 16_XPWU_SU163 | Huang et al 2019 [17]      |

|           |                                  |    |         |          |                |               |             |                   |                            |
|-----------|----------------------------------|----|---------|----------|----------------|---------------|-------------|-------------------|----------------------------|
| MG463074  | <i>Sinanodonta cf. elliptica</i> | 29 | ----    | ----     | Yangtze basin  | ----          | China       | NCU 16_XPWU_SU165 | Huang et al 2019 [17]      |
| MG463077  | <i>Sinanodonta cf. elliptica</i> | 34 | ----    | ----     | Yangtze basin  | ----          | China       | NCU 16_XPWU_SU168 | Huang et al 2019 [17]      |
| MG463079  | <i>Sinanodonta cf. elliptica</i> | 29 | ----    | ----     | Yangtze basin  | ----          | China       | NCU 16_XPWU_SU170 | Huang et al 2019 [17]      |
| MG933740  | <i>Sinanodonta cf. elliptica</i> | 31 | ----    | ----     | Yangtze basin  | ----          | China       | NCU BM 20180254   | Wu et al 2018 [96]         |
| MG933741  | <i>Sinanodonta cf. elliptica</i> | 34 | ----    | ----     | Yangtze basin  | ----          | China       | NCU BM 20180255   | Wu et al 2018 [96]         |
| MG933742  | <i>Sinanodonta cf. elliptica</i> | 29 | ----    | ----     | Yangtze basin  | ----          | China       | NCU BM 20180256   | Wu et al 2018 [96]         |
| KX822668  | <i>Sinanodonta jourdyi</i>       | 15 | 21.8855 | 106.563  | Tu Đồn         | Đông Bắc      | Vietnam     | NCSM 84916.01     | Lopes-Lima et al 2017 [90] |
| SUBMITTED | <i>Sinanodonta jourdyi</i>       | 15 | 21.8855 | 106.563  | Tu Đồn         | Đông Bắc      | Vietnam     | NCSM 84916.02     | THIS STUDY                 |
| SUBMITTED | <i>Sinanodonta jourdyi</i>       | 16 | 21.3269 | 103.9190 | Day River      | Tây Bắc       | Vietnam     | NCSM 84948        | THIS STUDY                 |
| SUBMITTED | <i>Sinanodonta jourdyi</i>       | 82 | 18.5314 | 105.7230 | ----           | Bắc Trung Bộ  | Vietnam     | NCSM 47207.01     | THIS STUDY                 |
| SUBMITTED | <i>Sinanodonta jourdyi</i>       | 82 | 18.5314 | 105.7230 | ----           | Bắc Trung Bộ  | Vietnam     | NCSM 47207.02     | THIS STUDY                 |
| SUBMITTED | <i>Sinanodonta jourdyi</i>       | 82 | 18.5314 | 105.7230 | ----           | Bắc Trung Bộ  | Vietnam     | NCSM 47207.03     | THIS STUDY                 |
| SUBMITTED | <i>Sinanodonta jourdyi</i>       | 14 | 21.3269 | 103.9190 | Day River      | Tây Bắc       | Vietnam     | NCSM 84952.02     | THIS STUDY                 |
| SUBMITTED | <i>Sinanodonta jourdyi</i>       | 14 | 21.3269 | 103.9190 | Day River      | Tây Bắc       | Vietnam     | NCSM 84952.03     | THIS STUDY                 |
| SUBMITTED | <i>Sinanodonta jourdyi</i>       | 84 | 21.9333 | 104.6310 | ----           | Đông Bắc      | Vietnam     | NCSM 84953        | THIS STUDY                 |
| SUBMITTED | <i>Sinanodonta jourdyi</i>       | 83 | 21.3243 | 105.4030 | ----           | Đông Bắc      | Vietnam     | NCSM 84980        | THIS STUDY                 |
| KY561635  | <i>Sinanodonta jourdyi</i>       | 16 | ----    | ----     | ----           | ----          | Vietnam     | RMBH biv_91_1     | Bolotov et al 2017 [9]     |
| KY978744  | <i>Sinanodonta jourdyi</i>       | 15 | ----    | ----     | ----           | ----          | Vietnam     | RMBH biv_91_2     | Bespalaya et al 2018 [96]  |
| KY978745  | <i>Sinanodonta jourdyi</i>       | 14 | ----    | ----     | ----           | ----          | Vietnam     | RMBH biv_91_3     | Bespalaya et al 2018 [96]  |
| MT020609  | <i>Sinanodonta lauta</i>         | 46 | 34.8639 | 126.9772 | Tamjin River   | Hwasun-gun    | South Korea | NNIBR IV29267     | Lopes-Lima et al 2020 [18] |
| MT020632  | <i>Sinanodonta lauta</i>         | 71 | 36.5527 | 129.4187 | Song Stream    | Yeongdeok-gun | South Korea | NNIBR IV29268     | Lopes-Lima et al 2020 [18] |
| MT020633  | <i>Sinanodonta lauta</i>         | 72 | 36.3799 | 128.4406 | Nakdong River  | Uiseon-gun    | South Korea | NNIBR IV29249     | Lopes-Lima et al 2020 [18] |
| MT020634  | <i>Sinanodonta lauta</i>         | 73 | 35.4232 | 127.2211 | Seomjin River  | Sunchang-gun  | South Korea | NNIBR IV29239     | Lopes-Lima et al 2020 [18] |
| MT020635  | <i>Sinanodonta lauta</i>         | 74 | 35.0204 | 126.8529 | Yeongsan River | Naju-si       | South Korea | NNIBR IV29269     | Lopes-Lima et al 2020 [18] |
| MT020636  | <i>Sinanodonta lauta</i>         | 75 | 35.9977 | 128.9181 | Nakdong River  | Yeongcheon-si | South Korea | NNIBR IV29270     | Lopes-Lima et al 2020 [18] |
| KY561633  | <i>Sinanodonta lauta</i>         | 37 | 55.9891 | 92.8699  | Yenisei River  | Krasnoyarsk   | Russia      | RMBH biv_191_1    | Bolotov et al 2017 [9]     |
| KY978737  | <i>Sinanodonta lauta</i>         | 37 | 55.9891 | 92.8699  | Yenisei River  | Krasnoyarsk   | Russia      | RMBH biv_191_4    | Bespalaya et al 2018 [96]  |
| KY978739  | <i>Sinanodonta lauta</i>         | 37 | 55.9891 | 92.8699  | Yenisei River  | Krasnoyarsk   | Russia      | RMBH biv_191_6    | Bespalaya et al 2018 [96]  |
| KY978740  | <i>Sinanodonta lauta</i>         | 37 | 55.9891 | 92.8699  | Yenisei River  | Krasnoyarsk   | Russia      | RMBH biv_191_7    | Bespalaya et al 2018 [96]  |
| KY978741  | <i>Sinanodonta lauta</i>         | 37 | 55.9891 | 92.8699  | Yenisei River  | Krasnoyarsk   | Russia      | RMBH biv_191_9    | Bespalaya et al 2018 [96]  |
| KY978742  | <i>Sinanodonta lauta</i>         | 36 | 42.7065 | 130.9084 | Gladkaya River | Primorye      | Russia      | RMBH biv_225_1    | Bespalaya et al 2018 [96]  |
| KY978743  | <i>Sinanodonta lauta</i>         | 36 | 42.7065 | 130.9084 | Gladkaya River | Primorye      | Russia      | RMBH biv_225_2    | Bespalaya et al 2018 [96]  |
| MT020606  | <i>Sinanodonta lauta</i>         | 36 | 42.8293 | 132.8849 | Solenoye Lake  | Primorye      | Russia      | RMBH biv_457_7    | Lopes-Lima et al 2020 [18] |
| AB040832  | <i>Sinanodonta lauta</i>         | 50 | ----    | ----     | ----           | ----          | Japan       | ----              | Okazaki M Unp.             |
| MT020614  | <i>Sinanodonta lauta</i>         | 51 | 34.7159 | 133.9835 | Asahi River    | Okayama       | Japan       | MHS MSj-okB       | Lopes-Lima et al 2020 [18] |
| MT020613  | <i>Sinanodonta lauta</i>         | 50 | 34.8023 | 135.0145 | Shijimi River  | Hyougo        | Japan       | MHS Hyougo_7      | Lopes-Lima et al 2020 [18] |

|           |                              |    |         |          |                 |              |             |                       |                            |
|-----------|------------------------------|----|---------|----------|-----------------|--------------|-------------|-----------------------|----------------------------|
| MT020613  | <i>Sinanodonta lauta</i>     | 50 | 33.0134 | 130.6384 | Kikuchi River   | Kumamoto     | Japan       | MHS Kumamoto_A        | Lopes-Lima et al 2020 [18] |
| MT020614  | <i>Sinanodonta lauta</i>     | 51 | 34.7159 | 133.9835 | Asahi River     | Okayama      | Japan       | MHS MSI-okB           | Lopes-Lima et al 2020 [18] |
| MT020640  | <i>Sinanodonta lauta</i>     | 79 | 36.1264 | 139.4715 | Oshikawa River  | Saitama      | Japan       | MHS MSI-snA           | Lopes-Lima et al 2020 [18] |
| MT020617  | <i>Sinanodonta lauta</i>     | 54 | 36.1120 | 139.7740 | Tone River      | Ibaraki      | Japan       | MHS S _lauta_Ibaraki  | Lopes-Lima et al 2020 [18] |
| MT020616  | <i>Sinanodonta lauta</i>     | 53 | 34.8570 | 137.9463 | Ohta River      | Shizuoka     | Japan       | MHS S _lauta_Shizuoka | Lopes-Lima et al 2020 [18] |
| MT020617  | <i>Sinanodonta lauta</i>     | 54 | 36.0555 | 139.8376 | Tone River      | Chiba        | Japan       | MHS SLCB-03           | Lopes-Lima et al 2020 [18] |
| MT020630  | <i>Sinanodonta lauta</i>     | 69 | 33.6583 | 130.7247 | Onga River      | Fukuoka      | Japan       | MHS SLFO-01           | Lopes-Lima et al 2020 [18] |
| MT020630  | <i>Sinanodonta lauta</i>     | 69 | 33.3931 | 130.433  | Raizan River    | Fukuoka      | Japan       | MHS SLFO-02           | Lopes-Lima et al 2020 [18] |
| MT020631  | <i>Sinanodonta lauta</i>     | 70 | 33.6373 | 130.4789 | Tatara River    | Fukuoka      | Japan       | MHS SLFO-03           | Lopes-Lima et al 2020 [18] |
| MT020613  | <i>Sinanodonta lauta</i>     | 50 | 33.6373 | 130.4789 | Tatara River    | Fukuoka      | Japan       | MHS SLFO-04           | Lopes-Lima et al 2020 [18] |
| MT020613  | <i>Sinanodonta lauta</i>     | 50 | 33.6884 | 130.9593 | Imagawa River   | Fukuoka      | Japan       | MHS SLFO-05           | Lopes-Lima et al 2020 [18] |
| MT020608  | <i>Sinanodonta lauta</i>     | 45 | 33.6583 | 130.7247 | Onga River      | Fukuoka      | Japan       | MHS SLFO-06           | Lopes-Lima et al 2020 [18] |
| MT020638  | <i>Sinanodonta lauta</i>     | 77 | 43.0129 | 144.4240 | Kushiro River   | Hokkaido     | Japan       | MHS SLHK-01           | Lopes-Lima et al 2020 [18] |
| MT020637  | <i>Sinanodonta lauta</i>     | 76 | 42.5680 | 141.3260 | Shiraoi River   | Hokkaido     | Japan       | MHS SLHK-02           | Lopes-Lima et al 2020 [18] |
| MT020617  | <i>Sinanodonta lauta</i>     | 54 | 35.8872 | 140.1412 | Tone River      | Ibaraki      | Japan       | MHS SLIB-01           | Lopes-Lima et al 2020 [18] |
| MT020639  | <i>Sinanodonta lauta</i>     | 78 | 36.5435 | 136.6694 | Saigawa River   | Ishikawa     | Japan       | MHS SLIK-01           | Lopes-Lima et al 2020 [18] |
| MT020613  | <i>Sinanodonta lauta</i>     | 50 | 32.7572 | 130.7288 | Midori River    | Kumamoto     | Japan       | MHS SLKM-01           | Lopes-Lima et al 2020 [18] |
| MT020613  | <i>Sinanodonta lauta</i>     | 50 | 32.0635 | 130.3469 | Kometsu River   | Kagoshima    | Japan       | OMNH-Mo-39123-1       | Lopes-Lima et al 2020 [18] |
| MT020613  | <i>Sinanodonta lauta</i>     | 50 | 32.0635 | 130.3469 | Kometsu River   | Kagoshima    | Japan       | OMNH-Mo-39123-2       | Lopes-Lima et al 2020 [18] |
| MT020613  | <i>Sinanodonta lauta</i>     | 50 | 32.0635 | 130.3469 | Kometsu River   | Kagoshima    | Japan       | OMNH-Mo-39123-3       | Lopes-Lima et al 2020 [18] |
| MT020613  | <i>Sinanodonta lauta</i>     | 50 | 32.0635 | 130.3469 | Kometsu River   | Kagoshima    | Japan       | MHS SLKS-04           | Lopes-Lima et al 2020 [18] |
| MT020614  | <i>Sinanodonta lauta</i>     | 51 | 34.7141 | 133.9771 | Asahi River     | Okayama      | Japan       | MHS SLOY-01           | Lopes-Lima et al 2020 [18] |
| MT020642  | <i>Sinanodonta lauta</i>     | 81 | 34.7141 | 133.9771 | Asahi River     | Okayama      | Japan       | MHS SLOY-02           | Lopes-Lima et al 2020 [18] |
| MT020629  | <i>Sinanodonta lauta</i>     | 68 | 35.2929 | 136.2219 | Biwa Lake       | Shiga        | Japan       | MHS SLSG-01           | Lopes-Lima et al 2020 [18] |
| MT020630  | <i>Sinanodonta lauta</i>     | 69 | 35.2929 | 136.2219 | Biwa Lake       | Shiga        | Japan       | MHS SLSG-02           | Lopes-Lima et al 2020 [18] |
| MT020641  | <i>Sinanodonta lauta</i>     | 80 | 35.2929 | 136.2219 | Biwa Lake       | Shiga        | Japan       | MHS SLSG-03           | Lopes-Lima et al 2020 [18] |
| KX822667  | <i>Sinanodonta lucida</i>    | 44 | -----   | -----    | Yangtze basin   | -----        | China       | -----                 | Lopes-Lima et al 2017 [90] |
| MG463066  | <i>Sinanodonta lucida</i>    | 44 | -----   | -----    | Yangtze basin   | Jiangxi      | China       | NCU 16_XPWU_SU152     | Huang et al 2019 [17]      |
| MG933735  | <i>Sinanodonta lucida</i>    | 44 | -----   | -----    | Yangtze basin   | -----        | China       | NCU BM 20180249       | Wu et al 2018 [96]         |
| NC_026673 | <i>Sinanodonta lucida</i>    | 44 | -----   | -----    | Yangtze basin   | -----        | China       | -----                 | Song et al 2016 [97]       |
| MT020618  | <i>Sinanodonta schrenkii</i> | 55 | 36.0219 | 127.7467 | Han River       | Wonju-si     | South Korea | NNIBR IV29271         | Lopes-Lima et al 2020 [18] |
| MT020619  | <i>Sinanodonta schrenkii</i> | 56 | 36.1899 | 127.1710 | Geum River      | Nonsan-si    | South Korea | NNIBR B048            | Lopes-Lima et al 2020 [18] |
| MT020620  | <i>Sinanodonta schrenkii</i> | 57 | 35.4224 | 127.2228 | Seomjin River   | Sunchang-gun | South Korea | NNIBR IV29234         | Lopes-Lima et al 2020 [18] |
| MT020620  | <i>Sinanodonta schrenkii</i> | 57 | 35.9143 | 126.7076 | Mangyeong River | Gunsan-si    | South Korea | NNIBR IV29272         | Lopes-Lima et al 2020 [18] |
| MT020621  | <i>Sinanodonta schrenkii</i> | 59 | 36.2461 | 126.6296 | Ungcheon Stream | Boryeong-si  | South Korea | NNIBR IV29245         | Lopes-Lima et al 2020 [18] |
| GQ451867  | <i>Sinanodonta schrenkii</i> | 58 | -----   | -----    | -----           | -----        | South Korea | -----                 | Park et al Unp.            |

|          |                                   |    |         |          |                   |          |             |                  |                            |
|----------|-----------------------------------|----|---------|----------|-------------------|----------|-------------|------------------|----------------------------|
| GQ451868 | <i>Sinanodonta schrenkii</i>      | 60 | ----    | ----     | ----              | ----     | South Korea | ----             | Park et al Unp.            |
| MK574238 | <i>Sinanodonta schrenkii</i>      | 38 | ----    | ----     | Ilistaya River    | Primorye | Russia      | CIIMAR BIV1528   | Bolotov et al 2020 [15]    |
| KU853266 | <i>Sinanodonta schrenkii</i>      | 38 | 43.5481 | 131.8931 | Razdolnaya River  | Primorye | Russia      | 348              | Sayenko et al 2017 [98]    |
| KU853267 | <i>Sinanodonta schrenkii</i>      | 38 | ----    | ----     | Arkharu River     | Amur     | Russia      | 349              | Sayenko et al 2017 [98]    |
| KU853268 | <i>Sinanodonta schrenkii</i>      | 38 | 44.7136 | 132.6502 | Khanka Lake       | Primorye | Russia      | 384              | Sayenko et al 2017 [98]    |
| KU853269 | <i>Sinanodonta schrenkii</i>      | 38 | ----    | ----     | Khanka Lake       | Primorye | Russia      | 395              | Sayenko et al 2017 [98]    |
| MT020607 | <i>Sinanodonta schrenkii</i>      | 38 | 45.8212 | 133.5731 | Arsenievka River  | Primorye | Russia      | RMBH biv_451_1   | Lopes-Lima et al 2020 [18] |
| MT020607 | <i>Sinanodonta schrenkii</i>      | 38 | 44.9189 | 131.9613 | Khanka Lake basin | Primorye | Russia      | RMBH biv_452_2   | Lopes-Lima et al 2020 [18] |
| MT020607 | <i>Sinanodonta schrenkii</i>      | 38 | 44.9189 | 131.9613 | Khanka Lake basin | Primorye | Russia      | RMBH biv_452_3   | Lopes-Lima et al 202 [18]0 |
| MT020611 | <i>Sinanodonta schrenkii</i>      | 48 | 44.9189 | 131.9613 | Khanka Lake basin | Primorye | Russia      | RMBH biv_458_1   | Lopes-Lima et al 2020 [18] |
| MT020612 | <i>Sinanodonta schrenkii</i>      | 49 | 45.8212 | 133.5731 | Arsenievka River  | Primorye | Russia      | RMBH biv_451_2   | Lopes-Lima et al 2020 [18] |
| MT020612 | <i>Sinanodonta schrenkii</i>      | 49 | 45.8212 | 133.5731 | Arsenievka River  | Primorye | Russia      | RMBH biv_451_3   | Lopes-Lima et al 2020 [18] |
| MT020622 | <i>Sinanodonta tumens</i>         | 61 | 34.8718 | 135.6754 | Yodo River        | Osaka    | Japan       | MHS afk156       | Lopes-Lima et al 2020 [18] |
| MT020622 | <i>Sinanodonta tumens</i>         | 61 | 35.2929 | 136.2219 | Biwa lake         | Shiga    | Japan       | MHS Og11_02_CFRH | Lopes-Lima et al 2020 [18] |
| MT020615 | <i>Sinanodonta cf. woodiana</i> 1 | 52 | 35.3778 | 136.9302 | Kiso River        | Aichi    | Japan       | MHS SLAC-01      | Lopes-Lima et al 2020 [18] |
| MT020605 | <i>Sinanodonta cf. woodiana</i> 1 | 17 | 36.0555 | 139.8376 | Tone River        | Chiba    | Japan       | MHS SLCB-01      | Lopes-Lima et al 2020 [18] |
| MT020605 | <i>Sinanodonta cf. woodiana</i> 1 | 17 | 36.0555 | 139.8376 | Tone River        | Chiba    | Japan       | MHS SLCB-02      | Lopes-Lima et al 2020 [18] |
| MT020605 | <i>Sinanodonta cf. woodiana</i> 1 | 17 | 35.9185 | 139.536  | Arakawa River     | Saitama  | Japan       | MHS SLST-01      | Lopes-Lima et al 2020 [18] |
| MT020610 | <i>Sinanodonta cf. woodiana</i> 1 | 47 | 36.0302 | 140.3067 | Kasumigaura Lake  | Ibaraki  | Japan       | MHS SLIB-02      | Lopes-Lima et al 2020 [18] |
| MT020610 | <i>Sinanodonta cf. woodiana</i> 1 | 47 | 35.8560 | 140.0353 | Teganuma Lake     | Ibaraki  | Japan       | MHS SLIB-03      | Lopes-Lima et al 2020 [18] |
| KU318377 | <i>Sinanodonta cf. woodiana</i> 1 | 17 | ----    | ----     | ----              | ----     | Singapore   | ASW1             | Ng et al 2016 [99]         |
| KX424967 | <i>Sinanodonta cf. woodiana</i> 1 | 17 | ----    | ----     | ----              | ----     | Phillipines | HL_UN1           | Fornillos et al Unp.       |
| KX424968 | <i>Sinanodonta cf. woodiana</i> 1 | 17 | ----    | ----     | ----              | ----     | Phillipines | SH_UN2           | Fornillos et al Unp.       |
| KX424969 | <i>Sinanodonta cf. woodiana</i> 1 | 17 | ----    | ----     | ----              | ----     | Phillipines | SH_UN4           | Fornillos et al Unp.       |
| KX424970 | <i>Sinanodonta cf. woodiana</i> 1 | 17 | ----    | ----     | ----              | ----     | Phillipines | SH_UN5           | Fornillos et al Unp.       |
| KX424971 | <i>Sinanodonta cf. woodiana</i> 1 | 24 | ----    | ----     | ----              | ----     | Phillipines | HL_SW3           | Fornillos et al Unp.       |
| KX424972 | <i>Sinanodonta cf. woodiana</i> 1 | 24 | ----    | ----     | ----              | ----     | Phillipines | HL_SW4A          | Fornillos et al Unp.       |
| KX424973 | <i>Sinanodonta cf. woodiana</i> 1 | 24 | ----    | ----     | ----              | ----     | Phillipines | HL_SW5B          | Fornillos et al Unp.       |
| KX424974 | <i>Sinanodonta cf. woodiana</i> 1 | 17 | ----    | ----     | ----              | ----     | Phillipines | HL_SW7A          | Fornillos et al Unp.       |
| KX424975 | <i>Sinanodonta cf. woodiana</i> 1 | 17 | ----    | ----     | ----              | ----     | Phillipines | HL_SW8B          | Fornillos et al Unp.       |
| KX424976 | <i>Sinanodonta cf. woodiana</i> 1 | 17 | ----    | ----     | ----              | ----     | Phillipines | HL_UN6           | Fornillos et al Unp.       |
| KX424977 | <i>Sinanodonta cf. woodiana</i> 1 | 17 | ----    | ----     | ----              | ----     | Phillipines | HL_UN8           | Fornillos et al Unp.       |
| KX424978 | <i>Sinanodonta cf. woodiana</i> 1 | 24 | ----    | ----     | ----              | ----     | Phillipines | HL_UN10          | Fornillos et al Unp.       |
| KX424979 | <i>Sinanodonta cf. woodiana</i> 1 | 24 | ----    | ----     | ----              | ----     | Phillipines | HL_UN12          | Fornillos et al Unp.       |
| MH319867 | <i>Sinanodonta cf. woodiana</i> 1 | 17 | ----    | ----     | ----              | ----     | Phillipines | UGSB 19577       | Stelbrink et al 2019 [101] |
| MH319868 | <i>Sinanodonta cf. woodiana</i> 1 | 17 | ----    | ----     | ----              | ----     | Phillipines | UGSB 19578       | Stelbrink et al 2019 [101] |

|          |                                          |    |      |      |                 |         |            |                   |                            |
|----------|------------------------------------------|----|------|------|-----------------|---------|------------|-------------------|----------------------------|
| KX051315 | <i>Sinanodonta</i> cf. <i>woodiana</i> 1 | 21 | ---- | ---- | ----            | ----    | Malaysia   | X149              | Zieritz et al 2016 [100]   |
| KX051316 | <i>Sinanodonta</i> cf. <i>woodiana</i> 1 | 19 | ---- | ---- | ----            | ----    | Malaysia   | X205              | Zieritz et al 2016 [100]   |
| KX051317 | <i>Sinanodonta</i> cf. <i>woodiana</i> 1 | 20 | ---- | ---- | ----            | ----    | Malaysia   | X224              | Zieritz et al 2016 [100]   |
| KX051318 | <i>Sinanodonta</i> cf. <i>woodiana</i> 1 | 17 | ---- | ---- | ----            | ----    | Malaysia   | CIIMAR BIV1778    | Zieritz et al 2016 [100]   |
| KX051319 | <i>Sinanodonta</i> cf. <i>woodiana</i> 1 | 20 | ---- | ---- | ----            | ----    | Malaysia   | CIIMAR BIV1605    | Zieritz et al 2016 [100]   |
| KX051320 | <i>Sinanodonta</i> cf. <i>woodiana</i> 1 | 17 | ---- | ---- | ----            | ----    | Malaysia   | CIIMAR BIV1691    | Zieritz et al 2016 [100]   |
| KX051321 | <i>Sinanodonta</i> cf. <i>woodiana</i> 1 | 17 | ---- | ---- | ----            | ----    | Malaysia   | CIIMAR BIV1793    | Zieritz et al 2016 [100]   |
| KX051322 | <i>Sinanodonta</i> cf. <i>woodiana</i> 1 | 20 | ---- | ---- | ----            | ----    | Malaysia   | X130              | Zieritz et al 2016 [100]   |
| KX051323 | <i>Sinanodonta</i> cf. <i>woodiana</i> 1 | 20 | ---- | ---- | ----            | ----    | Malaysia   | X117              | Zieritz et al 2016 [100]   |
| KX051324 | <i>Sinanodonta</i> cf. <i>woodiana</i> 1 | 19 | ---- | ---- | ----            | ----    | Malaysia   | X227              | Zieritz et al 2016 [100]   |
| KX051325 | <i>Sinanodonta</i> cf. <i>woodiana</i> 1 | 18 | ---- | ---- | ----            | ----    | Malaysia   | X134              | Zieritz et al 2016 [100]   |
| KX051326 | <i>Sinanodonta</i> cf. <i>woodiana</i> 1 | 17 | ---- | ---- | ----            | ----    | Malaysia   | X128              | Zieritz et al 2016 [100]   |
| KX051327 | <i>Sinanodonta</i> cf. <i>woodiana</i> 1 | 17 | ---- | ---- | ----            | ----    | Malaysia   | X98               | Zieritz et al 2016 [100]   |
| KX051328 | <i>Sinanodonta</i> cf. <i>woodiana</i> 1 | 22 | ---- | ---- | ----            | ----    | Malaysia   | S003              | Zieritz et al 2016 [100]   |
| MG591509 | <i>Sinanodonta</i> cf. <i>woodiana</i> 1 | 19 | ---- | ---- | ----            | ----    | Malaysia   | x372              | Zieritz et al 2016 [100]   |
| MG591510 | <i>Sinanodonta</i> cf. <i>woodiana</i> 1 | 19 | ---- | ---- | ----            | ----    | Malaysia   | x354              | Zieritz et al 2016 [100]   |
| MG591511 | <i>Sinanodonta</i> cf. <i>woodiana</i> 1 | 19 | ---- | ---- | ----            | ----    | Malaysia   | x363              | Zieritz et al 2016 [100]   |
| MG591512 | <i>Sinanodonta</i> cf. <i>woodiana</i> 1 | 23 | ---- | ---- | ----            | ----    | Malaysia   | x306              | Zieritz et al 2016 [100]   |
| MG591513 | <i>Sinanodonta</i> cf. <i>woodiana</i> 1 | 23 | ---- | ---- | ----            | ----    | Malaysia   | CIIMAR BIV2669    | Zieritz et al 2016 [100]   |
| MG591514 | <i>Sinanodonta</i> cf. <i>woodiana</i> 1 | 23 | ---- | ---- | ----            | ----    | Malaysia   | x304              | Zieritz et al 2016 [100]   |
| MG591515 | <i>Sinanodonta</i> cf. <i>woodiana</i> 1 | 20 | ---- | ---- | ----            | ----    | Malaysia   | x297              | Zieritz et al 2016 [100]   |
| MG591516 | <i>Sinanodonta</i> cf. <i>woodiana</i> 1 | 19 | ---- | ---- | ----            | ----    | Malaysia   | x284              | Zieritz et al 2016 [100]   |
| MG591517 | <i>Sinanodonta</i> cf. <i>woodiana</i> 1 | 19 | ---- | ---- | ----            | ----    | Malaysia   | x289              | Zieritz et al 2016 [100]   |
| MG591518 | <i>Sinanodonta</i> cf. <i>woodiana</i> 1 | 23 | ---- | ---- | ----            | ----    | Malaysia   | x301              | Zieritz et al 2016 [100]   |
| MG591519 | <i>Sinanodonta</i> cf. <i>woodiana</i> 1 | 19 | ---- | ---- | ----            | ----    | Malaysia   | x294              | Zieritz et al 2016 [100]   |
| MT020605 | <i>Sinanodonta</i> cf. <i>woodiana</i> 1 | 17 | ---- | ---- | ----            | ----    | Indonesia  | MHS Indonesia     | Lopes-Lima et al 2020 [18] |
| KU891641 | <i>Sinanodonta</i> cf. <i>woodiana</i> 1 | 17 | ---- | ---- | ----            | ----    | Indonesia  | RMBH wood1        | Bolotov et al 2016 [52]    |
| KU891642 | <i>Sinanodonta</i> cf. <i>woodiana</i> 1 | 17 | ---- | ---- | ----            | ----    | Indonesia  | RMBH wood2        | Bolotov et al 2016 [52]    |
| KJ434487 | <i>Sinanodonta</i> cf. <i>woodiana</i> 1 | 25 | ---- | ---- | ----            | ----    | China      | NCU 107ANWP1      | Uyang et al Unp.           |
| MG463048 | <i>Sinanodonta</i> cf. <i>woodiana</i> 1 | 28 | ---- | ---- | Yangtze basin   | Jiangxi | China      | NCU 16_XPWU_SU158 | Huang et al 2019 [17]      |
| MG463049 | <i>Sinanodonta</i> cf. <i>woodiana</i> 1 | 26 | ---- | ---- | Yangtze basin   | Jiangxi | China      | NCU 16_XPWU_SU159 | Huang et al 2019 [17]      |
| MG463050 | <i>Sinanodonta</i> cf. <i>woodiana</i> 1 | 27 | ---- | ---- | Yangtze basin   | Jiangxi | China      | NCU 16_XPWU_SU160 | Huang et al 2019 [17]      |
| MG463051 | <i>Sinanodonta</i> cf. <i>woodiana</i> 1 | 26 | ---- | ---- | Yangtze basin   | Jiangxi | China      | NCU 16_XPWU_SU161 | Huang et al 2019 [17]      |
| MG463052 | <i>Sinanodonta</i> cf. <i>woodiana</i> 1 | 25 | ---- | ---- | Poyang Lake     | Jiangxi | China      | NCU 16_XPWU_SU162 | Huang et al 2019 [17]      |
| MG581711 | <i>Sinanodonta</i> cf. <i>woodiana</i> 2 | 3  | ---- | ---- | Amu Darya River | Xorazm  | Uzbekistan | RMBH biv_279_1    | Kondakov et al 2018 [55]   |
| MG581712 | <i>Sinanodonta</i> cf. <i>woodiana</i> 2 | 3  | ---- | ---- | Amu Darya River | Xorazm  | Uzbekistan | RMBH biv_279_2    | Kondakov et al 2018 [55]   |

|          |                                          |    |         |         |                    |                 |         |                 |                           |
|----------|------------------------------------------|----|---------|---------|--------------------|-----------------|---------|-----------------|---------------------------|
| JQ253893 | <i>Sinanodonta</i> cf. <i>woodiana</i> 2 | 1  | ----    | ----    | ----               | ----            | Ukraine | PB22            | Yanovich et al Unp.       |
| JQ253894 | <i>Sinanodonta</i> cf. <i>woodiana</i> 2 | 1  | ----    | ----    | ----               | ----            | Ukraine | PB23            | Yanovich et al Unp.       |
| LC310750 | <i>Sinanodonta</i> cf. <i>woodiana</i> 2 | 1  | ----    | ----    | ----               | ----            | Spain   | ----            | Clusa et al 2017 [101]    |
| LC310751 | <i>Sinanodonta</i> cf. <i>woodiana</i> 2 | 1  | ----    | ----    | ----               | ----            | Spain   | ----            | Clusa et al 2017 [101]    |
| KY978735 | <i>Sinanodonta</i> cf. <i>woodiana</i> 2 | 1  | ----    | ----    | Yenisei River      | Krasnoyarsk     | Russia  | RMBH biv_191_2  | Bespalaya et al 2018 [96] |
| KY978736 | <i>Sinanodonta</i> cf. <i>woodiana</i> 2 | 1  | ----    | ----    | Yenisei River      | Krasnoyarsk     | Russia  | RMBH biv_191_3  | Bespalaya et al 2018 [96] |
| KY978738 | <i>Sinanodonta</i> cf. <i>woodiana</i> 2 | 1  | ----    | ----    | Yenisei River      | Krasnoyarsk     | Russia  | RMBH biv_191_5  | Bespalaya et al 2018 [96] |
| MG515741 | <i>Sinanodonta</i> cf. <i>woodiana</i> 2 | 1  | ----    | ----    | Danube River       | Svinita         | Romania | ROSV 21         | Konečný et al 2018 [102]  |
| MG515742 | <i>Sinanodonta</i> cf. <i>woodiana</i> 2 | 1  | ----    | ----    | Prut River         | Vadeni          | Romania | ROVA 11         | Konečný et al 2018 [102]  |
| AF468683 | <i>Sinanodonta</i> cf. <i>woodiana</i> 2 | 1  | ----    | ----    | ----               | ----            | Poland  | ----            | Soroka 2005 [104]         |
| EF440349 | <i>Sinanodonta</i> cf. <i>woodiana</i> 2 | 1  | ----    | ----    | ----               | ----            | Poland  | ----            | Soroka 2010 [105]         |
| HQ283344 | <i>Sinanodonta</i> cf. <i>woodiana</i> 2 | 1  | ----    | ----    | Odra River         | West. Pomerania | Poland  | AW19            | Soroka & Burzynski Unp.   |
| HQ283345 | <i>Sinanodonta</i> cf. <i>woodiana</i> 2 | 1  | ----    | ----    | Odra River         | West. Pomerania | Poland  | AW22            | Soroka 2010 [105]         |
| HQ283346 | <i>Sinanodonta</i> cf. <i>woodiana</i> 2 | 1  | ----    | ----    | Konin Lake         | Wielkopolska    | Poland  | AW124           | Soroka 2010 [105]         |
| HQ283347 | <i>Sinanodonta</i> cf. <i>woodiana</i> 2 | 1  | ----    | ----    | Konin Lake         | Wielkopolska    | Poland  | AW123           | Soroka & Burzynski Unp.   |
| HQ283348 | <i>Sinanodonta</i> cf. <i>woodiana</i> 2 | 1  | ----    | ----    | Konin Lake         | Wielkopolska    | Poland  | AW125           | Soroka & Burzynski Unp.   |
| KJ125078 | <i>Sinanodonta</i> cf. <i>woodiana</i> 2 | 1  | ----    | ----    | Polna River        | ----            | Poland  | 354             | Soroka et al 2014 [106]   |
| KJ125079 | <i>Sinanodonta</i> cf. <i>woodiana</i> 2 | 1  | ----    | ----    | Danube River       | ----            | Hungary | 375             | Vikhrev et al 2017 [107]  |
| MG515740 | <i>Sinanodonta</i> cf. <i>woodiana</i> 2 | 1  | ----    | ----    | Konin Lake         | Wielkopolska    | Poland  | PLKO 19         | Konečný et al 2018 [102]  |
| MF497807 | <i>Sinanodonta</i> cf. <i>woodiana</i> 2 | 1  | ----    | ----    | Irrawaddy River    | Bamo            | Myanmar | RMBH biv_269_15 | Vikhrev et al 2017 [107]  |
| MF497808 | <i>Sinanodonta</i> cf. <i>woodiana</i> 2 | 1  | ----    | ----    | Irrawaddy River    | Bamo            | Myanmar | RMBH biv_269_16 | Vikhrev et al 2017 [107]  |
| MF497809 | <i>Sinanodonta</i> cf. <i>woodiana</i> 2 | 1  | ----    | ----    | Irrawaddy River    | Bamo            | Myanmar | RMBH biv_269_17 | Vikhrev et al 2017 [107]  |
| KF731775 | <i>Sinanodonta</i> cf. <i>woodiana</i> 2 | 1  | ----    | ----    | Maggiore Lake      | Piemonte        | Italy   | M21             | Guarneri et al 2014 [108] |
| KF731776 | <i>Sinanodonta</i> cf. <i>woodiana</i> 2 | 1  | ----    | ----    | Po River           | ----            | Italy   | P15             | Guarneri et al 2014 [108] |
| KF731777 | <i>Sinanodonta</i> cf. <i>woodiana</i> 2 | 1  | ----    | ----    | Po River           | ----            | Italy   | P32             | Guarneri et al 2014 [108] |
| MF414328 | <i>Sinanodonta</i> cf. <i>woodiana</i> 2 | 1  | 43.0895 | 12.1532 | Trasimeno Lake     | ----            | Italy   | CIIMAR IT111    | Froufe et al 2017 [109]   |
| MF414329 | <i>Sinanodonta</i> cf. <i>woodiana</i> 2 | 1  | 43.0895 | 12.1532 | Trasimeno Lake     | ----            | Italy   | CIIMAR IT112    | Froufe et al 2017 [109]   |
| MF414330 | <i>Sinanodonta</i> cf. <i>woodiana</i> 2 | 1  | 43.0875 | 11.929  | Montepulciano Lake | ----            | Italy   | CIIMAR IT131    | Froufe et al 2017 [109]   |
| MF414331 | <i>Sinanodonta</i> cf. <i>woodiana</i> 2 | 1  | 43.0875 | 11.929  | Montepulciano Lake | ----            | Italy   | CIIMAR IT132    | Froufe et al 2017 [109]   |
| MF414332 | <i>Sinanodonta</i> cf. <i>woodiana</i> 2 | 1  | 43.0875 | 11.929  | Montepulciano Lake | ----            | Italy   | CIIMAR IT133    | Froufe et al 2017 [109]   |
| MF414333 | <i>Sinanodonta</i> cf. <i>woodiana</i> 2 | 1  | 43.0875 | 11.929  | Montepulciano Lake | ----            | Italy   | CIIMAR IT134    | Froufe et al 2017 [109]   |
| MF414334 | <i>Sinanodonta</i> cf. <i>woodiana</i> 2 | 1  | 43.0875 | 11.929  | Montepulciano Lake | ----            | Italy   | CIIMAR IT135    | Froufe et al 2017 [109]   |
| MF414335 | <i>Sinanodonta</i> cf. <i>woodiana</i> 2 | 1  | 43.0875 | 11.929  | Montepulciano Lake | ----            | Italy   | CIIMAR IT136    | Froufe et al 2017 [109]   |
| MF414336 | <i>Sinanodonta</i> cf. <i>woodiana</i> 2 | 1  | 41.1865 | 14.4636 | Volturno River     | ----            | Italy   | CIIMAR IT203    | Froufe et al 2017 [109]   |
| MF414337 | <i>Sinanodonta</i> cf. <i>woodiana</i> 2 | 1  | 41.1865 | 14.4636 | Volturno River     | ----            | Italy   | CIIMAR IT204    | Froufe et al 2017 [109]   |
| MF414338 | <i>Sinanodonta</i> cf. <i>woodiana</i> 2 | 10 | 43.8223 | 11.1336 | Bisenzio River     | ----            | Italy   | CIIMAR IT216    | Froufe et al 2017 [109]   |

|          |                                          |    |         |         |                |           |            |                   |                          |
|----------|------------------------------------------|----|---------|---------|----------------|-----------|------------|-------------------|--------------------------|
| MF414339 | <i>Sinanodonta</i> cf. <i>woodiana</i> 2 | 1  | 43.8223 | 11.1336 | Bisenzio River | ----      | Italy      | CIIMAR IT217      | Froufe et al 2017 [109]  |
| MF414340 | <i>Sinanodonta</i> cf. <i>woodiana</i> 2 | 1  | 43.8223 | 11.1336 | Bisenzio River | ----      | Italy      | CIIMAR IT218      | Froufe et al 2017 [109]  |
| MF414341 | <i>Sinanodonta</i> cf. <i>woodiana</i> 2 | 1  | 43.8223 | 11.1336 | Bisenzio River | ----      | Italy      | CIIMAR IT219      | Froufe et al 2017 [109]  |
| MF414342 | <i>Sinanodonta</i> cf. <i>woodiana</i> 2 | 1  | 43.8223 | 11.1336 | Bisenzio River | ----      | Italy      | CIIMAR IT220      | Froufe et al 2017 [109]  |
| MF414343 | <i>Sinanodonta</i> cf. <i>woodiana</i> 2 | 1  | ----    | ----    | Po River       |           | Italy      | CIIMAR SW1        | Froufe et al 2017 [109]  |
| MF414344 | <i>Sinanodonta</i> cf. <i>woodiana</i> 2 | 1  | ----    | ----    | Po River       |           | Italy      | CIIMAR SW2        | Froufe et al 2017 [109]  |
| MF414345 | <i>Sinanodonta</i> cf. <i>woodiana</i> 2 | 1  | ----    | ----    | Marcova River  |           | Italy      | CIIMAR SW24       | Froufe et al 2017 [109]  |
| MF414346 | <i>Sinanodonta</i> cf. <i>woodiana</i> 2 | 1  | ----    | ----    | Marcova River  |           | Italy      | CIIMAR SW26       | Froufe et al 2017 [109]  |
| MF414347 | <i>Sinanodonta</i> cf. <i>woodiana</i> 2 | 1  | ----    | ----    | Pusiano Lake   | ----      | Italy      | CIIMAR SW28       | Froufe et al 2017 [109]  |
| MF414348 | <i>Sinanodonta</i> cf. <i>woodiana</i> 2 | 1  | ----    | ----    | Pusiano Lake   | ----      | Italy      | CIIMAR SW29       | Froufe et al 2017 [109]  |
| MF414349 | <i>Sinanodonta</i> cf. <i>woodiana</i> 2 | 1  | ----    | ----    | Pusiano Lake   | ----      | Italy      | CIIMAR SW30       | Froufe et al 2017 [109]  |
| MF414350 | <i>Sinanodonta</i> cf. <i>woodiana</i> 2 | 1  | ----    | ----    | Pusiano Lake   | ----      | Italy      | CIIMAR SW31       | Froufe et al 2017 [109]  |
| MF414351 | <i>Sinanodonta</i> cf. <i>woodiana</i> 2 | 1  | ----    | ----    | Marcova River  |           | Italy      | CIIMAR SW32       | Froufe et al 2017 [109]  |
| MF414352 | <i>Sinanodonta</i> cf. <i>woodiana</i> 2 | 1  | ----    | ----    | Marcova River  |           | Italy      | CIIMAR SW33       | Froufe et al 2017 [109]  |
| MG515739 | <i>Sinanodonta</i> cf. <i>woodiana</i> 2 | 1  | ----    | ----    | ----           |           | France     | FR 1              | Konečný et al 2018 [102] |
| MG515737 | <i>Sinanodonta</i> cf. <i>woodiana</i> 2 | 1  | ----    | ----    | Kyjovka River  | ----      | Czech Rep. | CZKY 1            | Konečný et al 2018 [102] |
| MG515738 | <i>Sinanodonta</i> cf. <i>woodiana</i> 2 | 1  | ----    | ----    | ----           | Trebonsko | Czech Rep. | CZTR 2            | Konečný et al 2018 [102] |
| KJ434482 | <i>Sinanodonta</i> cf. <i>woodiana</i> 2 | 1  | ----    | ----    | Yangtze basin  | ----      | China      | NCU 117ANWE1      | Uyang et al Unp.         |
| KJ434483 | <i>Sinanodonta</i> cf. <i>woodiana</i> 2 | 6  | ----    | ----    | Yangtze basin  | ----      | China      | NCU 119ANWE2      | Uyang et al Unp.         |
| KJ434484 | <i>Sinanodonta</i> cf. <i>woodiana</i> 2 | 1  | ----    | ----    | Yangtze basin  | ----      | China      | NCU 121ANWE3      | Uyang et al Unp.         |
| KJ434485 | <i>Sinanodonta</i> cf. <i>woodiana</i> 2 | 1  | ----    | ----    | Yangtze basin  | ----      | China      | NCU 177ANWE4      | Uyang et al Unp.         |
| KJ434486 | <i>Sinanodonta</i> cf. <i>woodiana</i> 2 | 9  | ----    | ----    | Yangtze basin  | ----      | China      | NCU 179ANWE5      | Uyang et al Unp.         |
| MG463060 | <i>Sinanodonta</i> cf. <i>woodiana</i> 2 | 1  | ----    | ----    | Yangtze basin  | Jiangxi   | China      | NCU 16_XPWU_SU144 | Huang et al 2019 [17]    |
| MG463068 | <i>Sinanodonta</i> cf. <i>woodiana</i> 2 | 7  | ----    | ----    | Yangtze basin  | Jiangxi   | China      | NCU 16_XPWU_SU154 | Huang et al 2019 [17]    |
| MG463069 | <i>Sinanodonta</i> cf. <i>woodiana</i> 2 | 6  | ----    | ----    | Yangtze basin  | Jiangxi   | China      | NCU 16_XPWU_SU153 | Huang et al 2019 [17]    |
| MG463070 | <i>Sinanodonta</i> cf. <i>woodiana</i> 2 | 1  | ----    | ----    | Yangtze basin  | Hubei     | China      | NCU 16_XPWU_SU155 | Huang et al 2019 [17]    |
| MG463073 | <i>Sinanodonta</i> cf. <i>woodiana</i> 2 | 8  | ----    | ----    | Yangtze basin  | Hubei     | China      | NCU 16_XPWU_SU164 | Huang et al 2019 [17]    |
| MG463075 | <i>Sinanodonta</i> cf. <i>woodiana</i> 2 | 9  | ----    | ----    | Yangtze basin  | Jiangxi   | China      | NCU 16_XPWU_SU166 | Huang et al 2019 [17]    |
| MG463076 | <i>Sinanodonta</i> cf. <i>woodiana</i> 2 | 5  | ----    | ----    | Yangtze basin  | Jiangxi   | China      | NCU 16_XPWU_SU167 | Huang et al 2019 [17]    |
| MG463078 | <i>Sinanodonta</i> cf. <i>woodiana</i> 2 | 1  | ----    | ----    | Yangtze basin  | Jiangxi   | China      | NCU 16_XPWU_SU169 | Huang et al 2019 [17]    |
| MG463080 | <i>Sinanodonta</i> cf. <i>woodiana</i> 2 | 4  | ----    | ----    | Yangtze basin  | ----      | China      | NCU 16_XPWU_SU171 | Huang et al 2019 [17]    |
| MG515732 | <i>Sinanodonta</i> cf. <i>woodiana</i> 2 | 13 | ----    | ----    | Baoan Lake     | ----      | China      | CNBA 25           | Konečný et al 2018 [102] |
| MG515733 | <i>Sinanodonta</i> cf. <i>woodiana</i> 2 | 12 | ----    | ----    | Baoan Lake     | ----      | China      | CNBA 26           | Konečný et al 2018 [102] |
| MG515734 | <i>Sinanodonta</i> cf. <i>woodiana</i> 2 | 1  | ----    | ----    | Baoan Lake     | ----      | China      | CNBA 27           | Konečný et al 2018 [102] |
| MG515735 | <i>Sinanodonta</i> cf. <i>woodiana</i> 2 | 1  | ----    | ----    | Yangtze basin  | Nanchang  | China      | CNNA 1            | Konečný et al 2018 [102] |
| MG515736 | <i>Sinanodonta</i> cf. <i>woodiana</i> 2 | 11 | ----    | ----    | Yangtze basin  | Nanchang  | China      | CNNA 14           | Konečný et al 2018 [102] |

|                 |                                          |      |         |          |               |              |          |                 |                            |
|-----------------|------------------------------------------|------|---------|----------|---------------|--------------|----------|-----------------|----------------------------|
| MG933736        | <i>Sinanodonta</i> cf. <i>woodiana</i> 2 | 8    | ----    | ----     | Yangtze basin | ----         | China    | NCU BM 20180250 | Wu et al 2018 [96]         |
| MG933737        | <i>Sinanodonta</i> cf. <i>woodiana</i> 2 | 5    | ----    | ----     | Yangtze basin | ----         | China    | NCU BM 20180251 | Wu et al 2018 [96]         |
| MG933738        | <i>Sinanodonta</i> cf. <i>woodiana</i> 2 | 1    | ----    | ----     | Yangtze basin | ----         | China    | NCU BM 20180252 | Wu et al 2018 [96]         |
| MG933739        | <i>Sinanodonta</i> cf. <i>woodiana</i> 2 | 4    | ----    | ----     | Yangtze basin | ----         | China    | NCU BM 20180253 | Wu et al 2018 [96]         |
| NC_024943       | <i>Sinanodonta</i> cf. <i>woodiana</i> 2 | 2    | ----    | ----     | Yangtze basin | ----         | China    | ----            | Zhang et al 2016 [110]     |
| MG515731        | <i>Sinanodonta</i> cf. <i>woodiana</i> 2 | 1    | ----    | ----     | Iskar River   | ----         | Bulgaria | BGIS 1          | Konečný et al 2018 [102]   |
| <b>OUTGROUP</b> |                                          |      |         |          |               |              |          |                 |                            |
| SUBMITTED       | <i>Cristaria truncata</i>                | ---- | 22.5522 | 106.3966 | Bằng River    | Đông Bắc     | Vietnam  | IEBR FM CT02?   | THIS STUDY                 |
| SUBMITTED       | <i>Pletholophus honglinhensis</i>        | ---- | 18.5314 | 105.7234 | Hong Lin      | Bắc Trung Bộ | Vietnam  | NCSM 47211.1    | THIS STUDY                 |
| MH293546        | <i>Gibbosula crassa</i>                  | ---- | 44.9143 | 142.5843 | Bằng River    | Đông Bắc     | Vietnam  | IEBR FM GC01    | Lopes-Lima et al 2020 [18] |
