# Supplementary material for: The Anodontini of Vietnam (Mollusca: Bivalvia: Unionidae: Unioninae) with the Description of a New Species
Source: MDPI journal article supplement (doi:10.3390/d15060710), 2023-05-26
Supplement: s1 [file s1]

**Supplementary Table S2.** List of sequences used for the phylogenetic relationships within the genus *Pletholophus* with respective haplotypes, localities, voucher numbers or specimen codes, and GenBank references. Acronyms for the voucher deposit institutions as follows: IEBR – Institute of Ecology and Biological Resources, Hanoi, Vietnam; MHS – Matsuyama High School, Japan; NCSM – North Carolina Museum of Natural Sciences, U.S.A.

| Reference       | Species                                    | Haplotype | Latitude | Longitude | River/Lake     | Region       | Country | Voucher       | Study                      |
|-----------------|--------------------------------------------|-----------|----------|-----------|----------------|--------------|---------|---------------|----------------------------|
| <b>INGROUP</b>  |                                            |           |          |           |                |              |         |               |                            |
| SUBMITTED       | <i>Pletholophus honglinhensis</i> sp. nov. | 8         | 18.5314  | 105.7234  | Hồng Lĩnh      | Bắc Trung Bộ | Vietnam | NCSM 47211.1  | THIS STUDY                 |
| SUBMITTED       | <i>Pletholophus honglinhensis</i> sp. nov. | 8         | 18.5314  | 105.7234  | Hồng Lĩnh      | Bắc Trung Bộ | Vietnam | NCSM 103062.2 | THIS STUDY                 |
| SUBMITTED       | <i>Pletholophus honlingensis</i> sp. nov.  | 8         | 18.5314  | 105.7234  | Hồng Lĩnh      | Bắc Trung Bộ | Vietnam | NCSM 103062.3 | THIS STUDY                 |
| KX822658        | <i>Pletholophus tenuis</i>                 | 4         | 21.3243  | 105.4027  | Red basin      | Dong Bac     | Vietnam | NCSM 84924.1  | Lopes-Lima et al 2017 [90] |
| MT020602        | <i>Pletholophus tenuis</i>                 | 5         | 21.3243  | 105.4027  | Red basin      | Dong Bac     | Vietnam | NCSM 84924.3  | Lopes-Lima et al 2020 [18] |
| MT020599        | <i>Pletholophus tenuis</i>                 | 1         | 22.2386  | 106.5905  | Pearl basin    | Dong Bac     | Vietnam | NCSM 84943.1  | Lopes-Lima et al 2020 [18] |
| MT020599        | <i>Pletholophus tenuis</i>                 | 1         | 21.3269  | 103.9189  | Day River      | Tay Bac      | Vietnam | NCSM84951.2   | Lopes-Lima et al 2020 [18] |
| MT020599        | <i>Pletholophus tenuis</i>                 | 1         | 21.3269  | 103.9180  | Day River      | Tay Bac      | Vietnam | NCSM84951.3   | Lopes-Lima et al 2020 [18] |
| MT020600        | <i>Pletholophus tenuis</i>                 | 2         | 21.3269  | 103.9189  | Day River      | Tay Bac      | Vietnam | NCSM85006.1   | Lopes-Lima et al 2020 [18] |
| MT020599        | <i>Pletholophus tenuis</i>                 | 1         | 21.3269  | 103.9189  | Day River      | Tay Bac      | Vietnam | NCSM85006.2   | Lopes-Lima et al 2020 [18] |
| MT020601        | <i>Pletholophus tenuis</i>                 | 3         | 21.0878  | 105.6604  | Red basin      | Dong Bang    | Vietnam | NCSM 85273.10 | Lopes-Lima et al 2020 [18] |
| MT020604        | <i>Pletholophus reinianus</i>              | 7         | 33.8121  | 130.5397  | Turikawa River | Fukuoka      | Japan   | MHS PTFO-01   | Lopes-Lima et al 2020 [18] |
| MT020604        | <i>Pletholophus reinianus</i>              | 7         | 33.8121  | 130.5397  | Turikawa River | Fukuoka      | Japan   | MHS PTFO-02   | Lopes-Lima et al 2020 [18] |
| MT020603        | <i>Pletholophus reinianus</i>              | 6         | 24.3987  | 124.1994  | Nagura River   | Okinawa      | Japan   | MHS PTON-01   | Lopes-Lima et al 2020 [18] |
| MT020603        | <i>Pletholophus reinianus</i>              | 6         | 24.3987  | 124.1994  | Nagura River   | Okinawa      | Japan   | MHS PTON-02   | Lopes-Lima et al 2020 [18] |
| MT020603        | <i>Pletholophus reinianus</i>              | 6         | 24.3987  | 124.1994  | Nagura River   | Okinawa      | Japan   | MHS PTON-03   | Lopes-Lima et al 2020 [18] |
| <b>OUTGROUP</b> |                                            |           |          |           |                |              |         |               |                            |
| SUBMITTED       | <i>Cristaria truncata</i>                  | ----      | 22.5522  | 106.3966  | Bằng River     | Đông Bắc     | Vietnam | IEBR FM CT02? | THIS STUDY                 |
| SUBMITTED       | <i>Sinanodonta jourdyi</i>                 | ----      | 18.5314  | 105.7230  | -----          | Bắc Trung Bộ | Vietnam | NCSM 47207.01 | THIS STUDY                 |
| MH293546        | <i>Gibbosula crassa</i>                    | ----      | 44.9143  | 142.5843  | Bằng River     | Đông Bắc     | Vietnam | IEBR FM GC01  | Lopes-Lima et al 2020 [18] |
