# Supplementary material for: The Anodontini of Vietnam (Mollusca: Bivalvia: Unionidae: Unioninae) with the Description of a New Species
Source: MDPI journal article supplement (doi:10.3390/d15060710), 2023-05-26
Supplement: s1 [file s1]

**Supplementary Table S1.** List of sequences used for the phylogenetic relationships within the genus *Cristaria* with respective haplotypes, localities, voucher numbers or specimen codes, and GenBank references. Acronyms for the voucher deposit institutions as follows: IEBR – Institute of Ecology and Biological Resources, Hanoi, Vietnam; CIIMAR – Interdisciplinary Centre of Marine and Environmental Research, Porto, Portugal; MHS – Matsuyama High School, Japan; NCSM – North Carolina Museum of Natural Sciences, U.S.A.; NCU – Nanchang University, China; NNIBR – Nakdonggang National Institute of Biological Resources, South Korea; RMBH – Russian Museum of Biodiversity Hotspots, Arkhangelsk, Russia.

| Reference      | Species                   | Haplotype | Latitude | Longitude | River/Lake            | Region       | Country     | Voucher       | Study                      |
|----------------|---------------------------|-----------|----------|-----------|-----------------------|--------------|-------------|---------------|----------------------------|
| <b>INGROUP</b> |                           |           |          |           |                       |              |             |               |                            |
| ON704642       | <i>Cristaria bellua</i>   | 85        | ----     | ----      | Nam Ngum river        | ----         | Laos        | RMBH biv813/1 | Konopleva et al 2023 [86]  |
| ON704643       | <i>Cristaria bellua</i>   | 86        | ----     | ----      | Nam Ngum river        | ----         | Laos        | RMBH biv813/2 | Konopleva et al 2023 [86]  |
| ON704644       | <i>Cristaria bellua</i>   | 87        | ----     | ----      | Nam Ngum river        | ----         | Laos        | RMBH biv813/3 | Konopleva et al 2023 [86]  |
| ON704645       | <i>Cristaria bellua</i>   | 87        | ----     | ----      | Nam Don River         | ----         | Laos        | RMBH biv853/1 | Konopleva et al 2023 [86]  |
| ON704646       | <i>Cristaria bellua</i>   | 88        | ----     | ----      | Nam Don River         | ----         | Laos        | RMBH biv853/2 | Konopleva et al 2023 [86]  |
| ON704647       | <i>Cristaria bellua</i>   | 89        | ----     | ----      | Trib. of Nam<br>Ngiap |              | Laos        | RMBH biv891/1 | Konopleva et al 2023 [86]  |
| ON704648       | <i>Cristaria bellua</i>   | 89        | ----     | ----      | Trib. of Nam<br>Ngiap |              | Laos        | RMBH biv891/2 | Konopleva et al 2023 [86]  |
| ON704649       | <i>Cristaria bellua</i>   | 89        | ----     | ----      | Trib. of Nam<br>Ngiap |              | Laos        | RMBH biv891/5 | Konopleva et al 2023 [86]  |
| MT020592       | <i>Cristaria clessini</i> | 73        | 35.1419  | 136.0124  | Lake Biwa             | Shiga        | Japan       | MHS MCp-sigB  | Lopes-Lima et al 2020 [18] |
| MT020592       | <i>Cristaria clessini</i> | 73        | 36.0399  | 138.1002  | Yamanaka Lake         | Yamanashi    | Japan       | MHS CPNG-01   | Lopes-Lima et al 2020 [18] |
| MT020592       | <i>Cristaria clessini</i> | 73        | 36.2722  | 139.7518  | Omoi River            | Tochigi      | Japan       | MHS CPTG-03   | Lopes-Lima et al 2020 [18] |
| MT020592       | <i>Cristaria clessini</i> | 73        | 36.2722  | 139.7518  | Omoi River            | Tochigi      | Japan       | MHS CPTG-04   | Lopes-Lima et al 2020 [18] |
| MT025813       | <i>Cristaria clessini</i> | 78        | 38.7127  | 141.1051  | Izunuma Lake          | Miyagi       | Japan       | MHS FU003     | Lee 2017 [91]              |
| MT025814       | <i>Cristaria clessini</i> | 79        | 38.7127  | 141.1051  | Izunuma Lake          | Miyagi       | Japan       | MHS FU004     | Lee 2017 [91]              |
| KY561634       | <i>Cristaria plicata</i>  | 8         | ----     | ----      | Red River             | ----         | Vietnam     | RMBH biv_90_1 | Bolotov et al 2017 [15]    |
| MK574239       | <i>Cristaria plicata</i>  | 8         | ----     | ----      | Red River             | ----         | Vietnam     | RMBH biv_90_2 | Konopleva et al 2023 [86]  |
| MK574240       | <i>Cristaria plicata</i>  | 8         | ----     | ----      | Red River             | ----         | Vietnam     | RMBH biv_90_3 | Konopleva et al 2023 [86]  |
| MT020594       | <i>Cristaria plicata</i>  | 75        | 35.5749  | 128.3584  | Nakdong River         | Hapcheon-gun | South Korea | NNIBR IV29255 | Lopes-Lima et al 2020 [18] |
| MT020591       | <i>Cristaria plicata</i>  | 66        | 36.1899  | 127.171   | Geum River            | Nonsan-si    | South Korea | NNIBR IV29256 | Lopes-Lima et al 2020 [18] |
| GQ451860       | <i>Cristaria plicata</i>  | 65        | ----     | ----      | ----                  | ----         | South Korea | ----          | Park et al unp.            |

|          |                          |    |         |          |                    |               |             |                       |                            |
|----------|--------------------------|----|---------|----------|--------------------|---------------|-------------|-----------------------|----------------------------|
| GU944476 | <i>Cristaria plicata</i> | 71 | ----    | ----     | ----               | ----          | South Korea | ----                  | Lee et al 2012 [92]        |
| MT020591 | <i>Cristaria plicata</i> | 66 | 35.9143 | 126.7076 | Mangyeong River    | Gunsan-si     | South Korea | NNIBR B04             | Lopes-Lima et al 2020 [18] |
| KT348507 | <i>Cristaria plicata</i> | 68 | 46.4901 | 134.3584 | Ussury River       | Primorye      | Russia      | CIIMAR Biv1530        | Klishko et al 2016 [64]    |
| KT348508 | <i>Cristaria plicata</i> | 61 | 46.4901 | 134.3584 | Ussury River       | Primorye      | Russia      | CIIMAR Biv1531        | Klishko et al 2016 [64]    |
| KT362704 | <i>Cristaria plicata</i> | 69 | 50.5192 | 115.1342 | Onon River         | Transbaikalya | Russia      | CIIMAR Biv246         | Klishko et al 2014 [63]    |
| KT362705 | <i>Cristaria plicata</i> | 69 | 50.5192 | 115.1342 | Onon River         | Transbaikalya | Russia      | CIIMAR Biv247         | Klishko et al 2014[63]     |
| KU297678 | <i>Cristaria plicata</i> | 61 | 44.7075 | 132.0739 | Khanka Lake        | Primorye      | Russia      | CIIMAR BIV1537        | Klishko et al 2016 [64]    |
| KX822637 | <i>Cristaria plicata</i> | 9  | 50.5192 | 115.1342 | Onon River         | Transbaikalia | Russia      | ----                  | Lopes-Lima et al 2017 [18] |
| MK574241 | <i>Cristaria plicata</i> | 67 | ----    | ----     | Amur River         | Primorye      | Russia      | RMBH biv133/2         | Konopleva et al 2023 [86]  |
| MK574242 | <i>Cristaria plicata</i> | 61 | ----    | ----     | Khanka Lake        | Primorye      | Russia      | RMBH biv276/2         | Konopleva et al 2023 [86]  |
| MK574243 | <i>Cristaria plicata</i> | 72 | ----    | ----     | Khanka Lake        | Primorye      | Russia      | RMBH biv495/23        | Konopleva et al 2023 [86]  |
| MK574244 | <i>Cristaria plicata</i> | 76 | ----    | ----     | Khanka Lake        | Primorye      | Russia      | RMBH biv495/27        | Konopleva et al 2023 [86]  |
| MK574245 | <i>Cristaria plicata</i> | 60 | ----    | ----     | Khanka Lake        | Primorye      | Russia      | RMBH biv495/28        | Konopleva et al 2023 [86]  |
| MT020595 | <i>Cristaria plicata</i> | 74 | 40.757  | 141.328  | Ogawara Lake       | Aomori        | Japan       | MHS<br>Cp21_12_CFFFRH | Lopes-Lima et al 2020 [18] |
| MT020596 | <i>Cristaria plicata</i> | 77 | 40.711  | 141.331  | Anemuma Lake       | Aomori        | Japan       | MHS CP_2-Ane-KON      | Lopes-Lima et al 2020 [18] |
| MT020593 | <i>Cristaria plicata</i> | 74 | 36.0361 | 139.8702 | Tone River         | Ibaraki       | Japan       | MHS CPIX-01           | Lopes-Lima et al 2020 [18] |
| MT020593 | <i>Cristaria plicata</i> | 74 | 36.0361 | 139.8702 | Tone River         | Ibaraki       | Japan       | MHS CPIX-02           | Lopes-Lima et al 2020 [18] |
| MT020593 | <i>Cristaria plicata</i> | 74 | 36.0361 | 139.8702 | Tone River         | Ibaraki       | Japan       | MHS CPIX-03           | Lopes-Lima et al 2020 [18] |
| MT020595 | <i>Cristaria plicata</i> | 74 | 36.928  | 136.825  | Ochigata Lake      | Ishikawa      | Japan       | MHS<br>Cp33_01_CFFFRH | Lopes-Lima et al 2020 [18] |
| MT020595 | <i>Cristaria plicata</i> | 74 | 37.228  | 138.344  | Uno Pond           | Niigata       | Japan       | MHS<br>Cp31_01_CFFFRH | Lopes-Lima et al 2020 [18] |
| MT020595 | <i>Cristaria plicata</i> | 74 | 35.4788 | 133.0161 | Nishikatauchi Lake | Shimane       | Japan       | MHS CP_5-Mat-OSHI     | Lopes-Lima et al 2020 [18] |
| MT020593 | <i>Cristaria plicata</i> | 74 | 36.2722 | 139.7518 | Omoi River         | Tochigi       | Japan       | MHS CPTG-01           | Lopes-Lima et al 2020 [18] |
| MT020593 | <i>Cristaria plicata</i> | 74 | 36.2722 | 139.7518 | Omoi River         | Tochigi       | Japan       | MHS CPTG-02           | Lopes-Lima et al 2020 [18] |
| MT025815 | <i>Cristaria plicata</i> | 74 | 37.2280 | 138.3440 | Uno Pond           | Niigata       | Japan       | MHS CPNG-02           | Lee 2017 [91]              |
| MT025815 | <i>Cristaria plicata</i> | 74 | 39.9201 | 139.7518 | Hachirogata Lake   | Akita         | Japan       | MHS CPAK-01           | Lee 2017 [91]              |
| MT025815 | <i>Cristaria plicata</i> | 74 | 39.9201 | 139.7518 | Hachirogata Lake   | Akita         | Japan       | MHS CPAK-02           | Lee 2017 [91]              |

|          |                          |    |         |          |                |          |       |             |                        |
|----------|--------------------------|----|---------|----------|----------------|----------|-------|-------------|------------------------|
| MT025815 | <i>Cristaria plicata</i> | 74 | 35.4984 | 134.1606 | Koyamaike Lake | Tottori  | Japan | MHS CPTT-01 | Lee 2017 [91]          |
| MT025815 | <i>Cristaria plicata</i> | 74 | 35.4984 | 134.1606 | Koyamaike Lake | Tottori  | Japan | MHS CPTT-02 | Lee 2017 [91]          |
| MT025815 | <i>Cristaria plicata</i> | 74 | 35.4788 | 133.0154 | Sada River     | Shimane  | Japan | MHS CPSN-02 | Lee 2017 [91]          |
| MT025815 | <i>Cristaria plicata</i> | 74 | 35.4788 | 133.0154 | Sada River     | Shimane  | Japan | MHS CPSN-03 | Lee 2017 [91]          |
| MT025815 | <i>Cristaria plicata</i> | 74 | 37.2280 | 138.3440 | Uno Pond       | Niigata  | Japan | MHS CPNG-03 | Lee 2017 [91]          |
| MT025816 | <i>Cristaria plicata</i> | 81 | 36.9280 | 136.8250 | Ochigata Lake  | Ishikawa | Japan | MHS CPIK-02 | Lee 2017 [91]          |
| MT025815 | <i>Cristaria plicata</i> | 74 | 35.4984 | 133.0154 | Sada River     | Shimane  | Japan | MHS CPSN-04 | Lee 2017 [91]          |
| MT025817 | <i>Cristaria plicata</i> | 82 | 36.9280 | 136.8250 | Ochigata Lake  | Ishikawa | Japan | MHS CPIK-03 | Lee 2017 [91]          |
| MT025811 | <i>Cristaria plicata</i> | 1  | 35.4984 | 134.1606 | Koyamaike Lake | Tottori  | Japan | MHS CPTT-03 | Lee 2017 [91]          |
| MT025811 | <i>Cristaria plicata</i> | 1  | 35.4984 | 134.1606 | Koyamaike Lake | Tottori  | Japan | MHS CPTT-04 | Lee 2017 [91]          |
| MT025811 | <i>Cristaria plicata</i> | 1  | 35.4984 | 134.1606 | Koyamaike Lake | Tottori  | Japan | MHS CPTT-05 | Lee 2017 [91]          |
| MT025811 | <i>Cristaria plicata</i> | 1  | 40.7414 | 141.2772 | Ogawara Lake   | Aomori   | Japan | MHS CPAM-03 | Lee 2017 [91]          |
| MT025812 | <i>Cristaria plicata</i> | 2  | 40.7414 | 141.2772 | Ogawara Lake   | Aomori   | Japan | MHS CPAM-04 | Lee 2017 [91]          |
| EU698893 | <i>Cristaria plicata</i> | 63 | ----    | ----     | Yangtze basin  | ----     | China | H1          | Jia-Le et al 2009 [95] |
| EU698894 | <i>Cristaria plicata</i> | 62 | ----    | ----     | Yangtze basin  | ----     | China | H2          | Jia-Le et al 2009 [95] |
| EU698895 | <i>Cristaria plicata</i> | 61 | ----    | ----     | Yangtze basin  | ----     | China | H3          | Jia-Le et al 2009 [95] |
| EU698896 | <i>Cristaria plicata</i> | 60 | ----    | ----     | Yangtze basin  | ----     | China | H4          | Jia-Le et al 2009 [95] |
| EU698897 | <i>Cristaria plicata</i> | 5  | ----    | ----     | Yangtze basin  | ----     | China | H5          | Jia-Le et al 2009 [95] |
| EU698898 | <i>Cristaria plicata</i> | 59 | ----    | ----     | Yangtze basin  | ----     | China | H6          | Jia-Le et al 2009 [95] |
| EU698899 | <i>Cristaria plicata</i> | 58 | ----    | ----     | Yangtze basin  | ----     | China | H7          | Jia-Le et al 2009 [95] |
| EU698900 | <i>Cristaria plicata</i> | 57 | ----    | ----     | Yangtze basin  | ----     | China | H8          | Jia-Le et al 2009 [95] |
| EU698901 | <i>Cristaria plicata</i> | 56 | ----    | ----     | Yangtze basin  | ----     | China | H9          | Jia-Le et al 2009 [95] |
| EU698902 | <i>Cristaria plicata</i> | 55 | ----    | ----     | Yangtze basin  | ----     | China | H10         | Jia-Le et al 2009 [95] |
| EU698903 | <i>Cristaria plicata</i> | 4  | ----    | ----     | Yangtze basin  | ----     | China | H11         | Jia-Le et al 2009 [95] |
| EU698904 | <i>Cristaria plicata</i> | 54 | ----    | ----     | Yangtze basin  | ----     | China | H12         | Jia-Le et al 2009 [95] |
| EU698905 | <i>Cristaria plicata</i> | 53 | ----    | ----     | Yangtze basin  | ----     | China | H13         | Jia-Le et al 2009 [95] |
| EU698906 | <i>Cristaria plicata</i> | 52 | ----    | ----     | Yangtze basin  | ----     | China | H14         | Jia-Le et al 2009 [95] |
| EU698907 | <i>Cristaria plicata</i> | 51 | ----    | ----     | Yangtze basin  | ----     | China | H15         | Jia-Le et al 2009 [95] |
| EU698908 | <i>Cristaria plicata</i> | 50 | ----    | ----     | Yangtze basin  | ----     | China | H16         | Jia-Le et al 2009 [95] |
| EU698911 | <i>Cristaria plicata</i> | 47 | ----    | ----     | Yangtze basin  | ----     | China | H19         | Jia-Le et al 2009 [95] |
| EU698912 | <i>Cristaria plicata</i> | 46 | ----    | ----     | Yangtze basin  | ----     | China | H20         | Jia-Le et al 2009 [95] |
| EU698913 | <i>Cristaria plicata</i> | 45 | ----    | ----     | Yangtze basin  | ----     | China | H21         | Jia-Le et al 2009 [95] |
| EU698914 | <i>Cristaria plicata</i> | 44 | ----    | ----     | Yangtze basin  | ----     | China | H22         | Jia-Le et al 2009 [95] |
| EU698915 | <i>Cristaria plicata</i> | 43 | ----    | ----     | Yangtze basin  | ----     | China | H23         | Jia-Le et al 2009 [95] |
| EU698916 | <i>Cristaria plicata</i> | 42 | ----    | ----     | Yangtze basin  | ----     | China | H24         | Jia-Le et al 2009 [95] |
| EU698917 | <i>Cristaria plicata</i> | 41 | ----    | ----     | Yangtze basin  | ----     | China | H25         | Jia-Le et al 2009 [95] |

|          |                          |    |      |      |               |         |       |                   |                        |
|----------|--------------------------|----|------|------|---------------|---------|-------|-------------------|------------------------|
| EU698918 | <i>Cristaria plicata</i> | 40 | ---- | ---- | Yangtze basin | ----    | China | H26               | Jia-Le et al 2009 [95] |
| EU698919 | <i>Cristaria plicata</i> | 39 | ---- | ---- | Yangtze basin | ----    | China | H27               | Jia-Le et al 2009 [95] |
| EU698920 | <i>Cristaria plicata</i> | 38 | ---- | ---- | Yangtze basin | ----    | China | H28               | Jia-Le et al 2009 [95] |
| EU698921 | <i>Cristaria plicata</i> | 37 | ---- | ---- | Yangtze basin | ----    | China | H29               | Jia-Le et al 2009 [95] |
| EU698922 | <i>Cristaria plicata</i> | 36 | ---- | ---- | Yangtze basin | ----    | China | H30               | Jia-Le et al 2009 [95] |
| EU698923 | <i>Cristaria plicata</i> | 35 | ---- | ---- | Yangtze basin | ----    | China | H31               | Jia-Le et al 2009 [95] |
| EU698924 | <i>Cristaria plicata</i> | 34 | ---- | ---- | Yangtze basin | ----    | China | H32               | Jia-Le et al 2009 [95] |
| EU698925 | <i>Cristaria plicata</i> | 6  | ---- | ---- | Yangtze basin | ----    | China | H33               | Jia-Le et al 2009 [95] |
| EU698926 | <i>Cristaria plicata</i> | 33 | ---- | ---- | Yangtze basin | ----    | China | H34               | Jia-Le et al 2009 [95] |
| EU698927 | <i>Cristaria plicata</i> | 32 | ---- | ---- | Yangtze basin | ----    | China | H35               | Jia-Le et al 2009 [95] |
| EU698928 | <i>Cristaria plicata</i> | 31 | ---- | ---- | Yangtze basin | ----    | China | H36               | Jia-Le et al 2009 [95] |
| EU698929 | <i>Cristaria plicata</i> | 30 | ---- | ---- | Yangtze basin | ----    | China | H37               | Jia-Le et al 2009 [95] |
| EU698930 | <i>Cristaria plicata</i> | 29 | ---- | ---- | Yangtze basin | ----    | China | H38               | Jia-Le et al 2009 [95] |
| EU698931 | <i>Cristaria plicata</i> | 28 | ---- | ---- | Yangtze basin | ----    | China | H39               | Jia-Le et al 2009 [95] |
| EU698932 | <i>Cristaria plicata</i> | 27 | ---- | ---- | Yangtze basin | ----    | China | H40               | Jia-Le et al 2009 [95] |
| EU698933 | <i>Cristaria plicata</i> | 26 | ---- | ---- | Yangtze basin | ----    | China | H41               | Jia-Le et al 2009 [95] |
| EU698934 | <i>Cristaria plicata</i> | 25 | ---- | ---- | Yangtze basin | ----    | China | H42               | Jia-Le et al 2009 [95] |
| EU698935 | <i>Cristaria plicata</i> | 24 | ---- | ---- | Yangtze basin | ----    | China | H43               | Jia-Le et al 2009 [95] |
| EU698936 | <i>Cristaria plicata</i> | 23 | ---- | ---- | Yangtze basin | ----    | China | H44               | Jia-Le et al 2009 [95] |
| EU698938 | <i>Cristaria plicata</i> | 22 | ---- | ---- | Yangtze basin | ----    | China | H46               | Jia-Le et al 2009 [95] |
| EU698939 | <i>Cristaria plicata</i> | 21 | ---- | ---- | Yangtze basin | ----    | China | H47               | Jia-Le et al 2009 [95] |
| EU698941 | <i>Cristaria plicata</i> | 16 | ---- | ---- | Yangtze basin | ----    | China | H49               | Jia-Le et al 2009 [95] |
| EU698944 | <i>Cristaria plicata</i> | 15 | ---- | ---- | Yangtze basin | ----    | China | H52               | Jia-Le et al 2009 [95] |
| EU698945 | <i>Cristaria plicata</i> | 14 | ---- | ---- | Yangtze basin | ----    | China | H53               | Jia-Le et al 2009 [95] |
| EU698946 | <i>Cristaria plicata</i> | 13 | ---- | ---- | Yangtze basin | ----    | China | H54               | Jia-Le et al 2009 [95] |
| EU698947 | <i>Cristaria plicata</i> | 12 | ---- | ---- | Yangtze basin | ----    | China | H55               | Jia-Le et al 2009 [95] |
| EU698948 | <i>Cristaria plicata</i> | 11 | ---- | ---- | Yangtze basin | ----    | China | H56               | Jia-Le et al 2009 [95] |
| EU698949 | <i>Cristaria plicata</i> | 10 | ---- | ---- | Yangtze basin | ----    | China | H57               | Jia-Le et al 2009 [95] |
| EU698950 | <i>Cristaria plicata</i> | 7  | ---- | ---- | Yangtze basin | ----    | China | H58               | Jia-Le et al 2009 [95] |
| JF700152 | <i>Cristaria plicata</i> | 64 | ---- | ---- | ----          | ----    | China | AS13MT01          | Zhang et al Unp        |
| JF700153 | <i>Cristaria plicata</i> | 63 | ---- | ---- | ----          | ----    | China | AS13MT02          | Zhang et al Unp        |
| KM233451 | <i>Cristaria plicata</i> | 5  | ---- | ---- | ----          | ----    | China | ----              | Wang et al 2016 [94]   |
| MG462956 | <i>Cristaria plicata</i> | 6  | ---- | ---- | Gan River     | Jiangxi | China | NCU 16_XPWU_SU047 | Huang et al 2019 [17]  |
| MG462957 | <i>Cristaria plicata</i> | 5  | ---- | ---- | Gan River     | Jiangxi | China | NCU 16_XPWU_SU048 | Huang et al 2019 [17]  |
| MG462958 | <i>Cristaria plicata</i> | 4  | ---- | ---- | Wang Lake     | Hubei   | China | NCU 16_XPWU_SU049 | Huang et al 2019 [17]  |
| MG462959 | <i>Cristaria plicata</i> | 3  | ---- | ---- | Qinglan Lake  | Jiangxi | China | NCU 16_XPWU_SU050 | Huang et al 2019 [17]  |

|                 |                                   |      |         |          |               |              |         |                 |                            |
|-----------------|-----------------------------------|------|---------|----------|---------------|--------------|---------|-----------------|----------------------------|
| MG933708        | <i>Cristaria plicata</i>          | 7    | ----    | ----     | ----          | ----         | China   | NCU BM 20180222 | Wu et al 2018 [95]         |
| NC_012716       | <i>Cristaria plicata</i>          | 70   | ----    | ----     | ----          | Zhejiang     | China   | ----            | Jiang et al Unp.           |
| EU698909        | <i>Cristaria</i> sp.              | 49   | ----    | ----     | Yangtze basin | ----         | China   | H17             | Jia-Le et al 2009 [95]     |
| EU698910        | <i>Cristaria</i> sp.              | 48   | ----    | ----     | Yangtze basin | ----         | China   | H18             | Jia-Le et al 2009 [95]     |
| EU698937        | <i>Cristaria</i> sp.              | 20   | ----    | ----     | Yangtze basin | ----         | China   | H45             | Jia-Le et al 2009 [95]     |
| EU698940        | <i>Cristaria</i> sp.              | 19   | ----    | ----     | Yangtze basin | ----         | China   | H48             | Jia-Le et al 2009 [95]     |
| EU698942        | <i>Cristaria</i> sp.              | 18   | ----    | ----     | Yangtze basin | ----         | China   | H50             | Jia-Le et al 2009 [95]     |
| EU698943        | <i>Cristaria</i> sp.              | 17   | ----    | ----     | Yangtze basin | ----         | China   | H51             | Jia-Le et al 2009 [95]     |
| OP491287        | <i>Cristaria truncata</i>         | 83   | 22.5522 | 106.3966 | Bằng River    | Đông Bắc     | Vietnam | IEBR FM CT01    | Konopleva et al 2023 [86]  |
| OP491288        | <i>Cristaria truncata</i>         | 84   | 22.5522 | 106.3966 | Bằng River    | Đông Bắc     | Vietnam | IEBR FM CT02    | Konopleva et al 2023 [86]  |
| OP491289        | <i>Cristaria truncata</i>         | 84   | 22.5522 | 106.3966 | Bằng River    | Đông Bắc     | Vietnam | NCSM 102885.1   | Konopleva et al 2023 [86]  |
| OP491290        | <i>Cristaria truncata</i>         | 84   | 22.5522 | 106.3966 | Bằng River    | Đông Bắc     | Vietnam | NCSM 102885.2   | Konopleva et al 2023 [86]  |
| OP491291        | <i>Cristaria truncata</i>         | 84   | 22.5522 | 106.3966 | Bằng River    | Đông Bắc     | Vietnam | NCSM 102885.3   | Konopleva et al 2023 [86]  |
| <b>OUTGROUP</b> |                                   |      |         |          |               |              |         |                 |                            |
| SUBMITTED       | <i>Pletholophus honglinhensis</i> | ---- | 18.5314 | 105.7234 | Hong Lin      | Bắc Trung Bộ | Vietnam | NCSM 47211.1    | THIS STUDY                 |
| SUBMITTED       | <i>Sinanodonta jourdyi</i>        | ---- | 18.5314 | 105.7230 | ----          | Bắc Trung Bộ | Vietnam | NCSM 47207.01   | THIS STUDY                 |
| MH293546        | <i>Gibbosula crassa</i>           | ---- | 44.9143 | 142.5843 | Bằng River    | Đông Bắc     | Vietnam | IEBR FM GC01    | Lopes-Lima et al 2020 [18] |
